# Supplementary material
Source: ML conference proceedings conference paper supplement (https://proceedings.mlr.press/v119/domke20a.html)
Supplement: Supplementary file [file domke20a-supp.pdf]

## 8. Additional Demonstration Plots

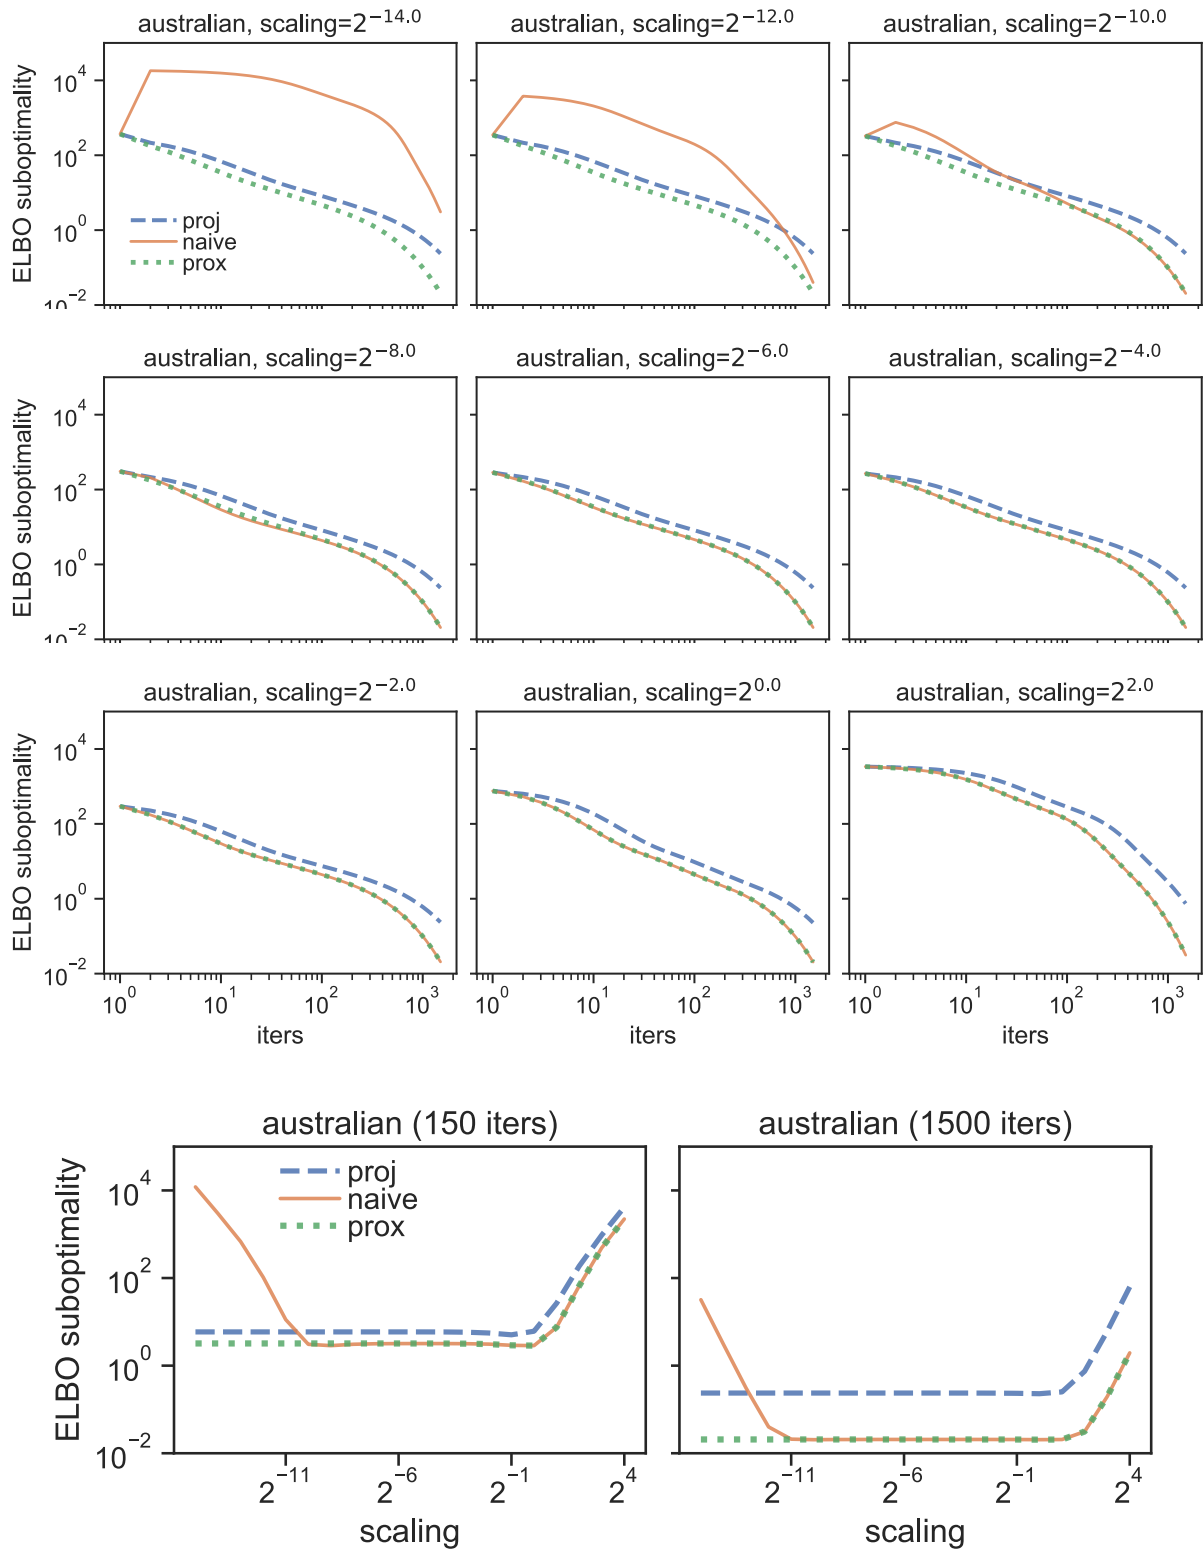

Figure 4. Looseness of the objective obtained by naive gradient descent ( $\gamma = 1/M$ ), projected gradient descent ( $\gamma = 1/(2M)$ ) and proximal gradient descent ( $\gamma = 1/M$ ). Optimization starts with  $\mathbf{m} = 0$  and  $C = \rho I$  where  $\rho$  is a scaling factor.

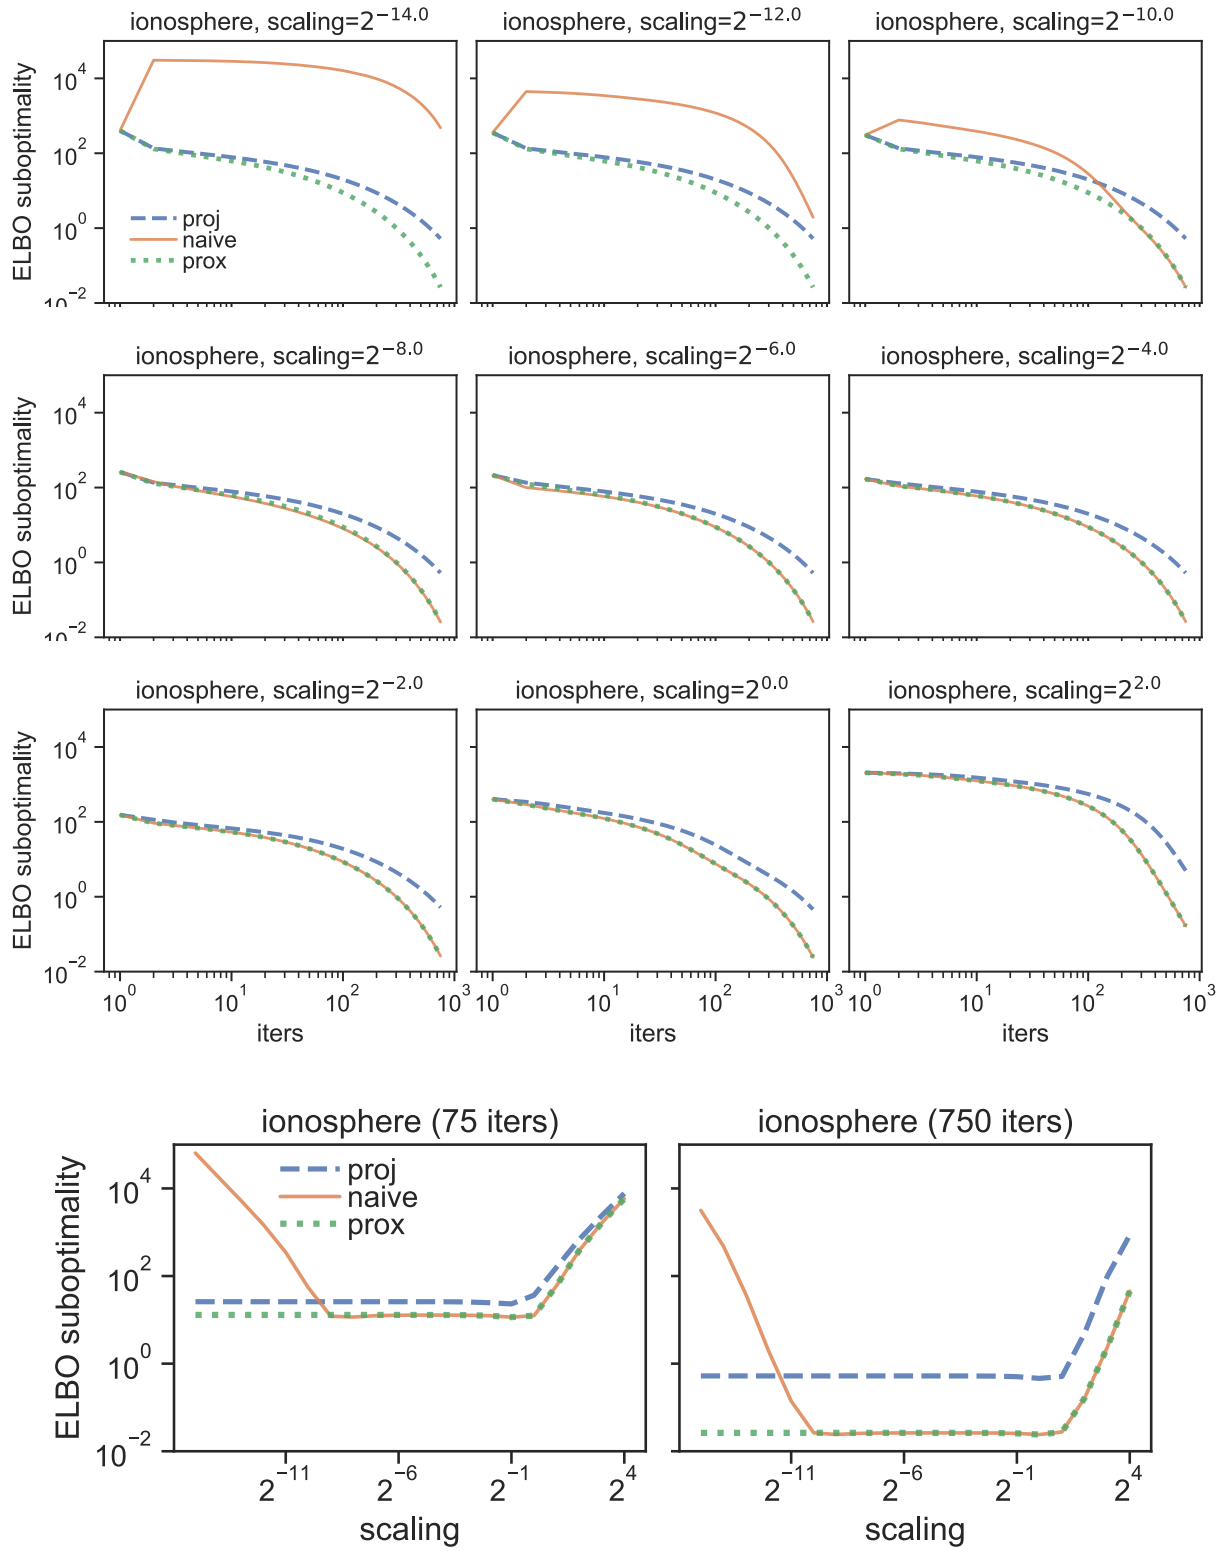

Figure 5. Looseness of the objective obtained by naive gradient descent ( $\gamma = 1/M$ ), projected gradient descent ( $\gamma = 1/(2M)$ ) and proximal gradient descent ( $\gamma = 1/M$ ). Optimization starts with  $\mathbf{m} = 0$  and  $C = \rho I$  where  $\rho$  is a scaling factor.

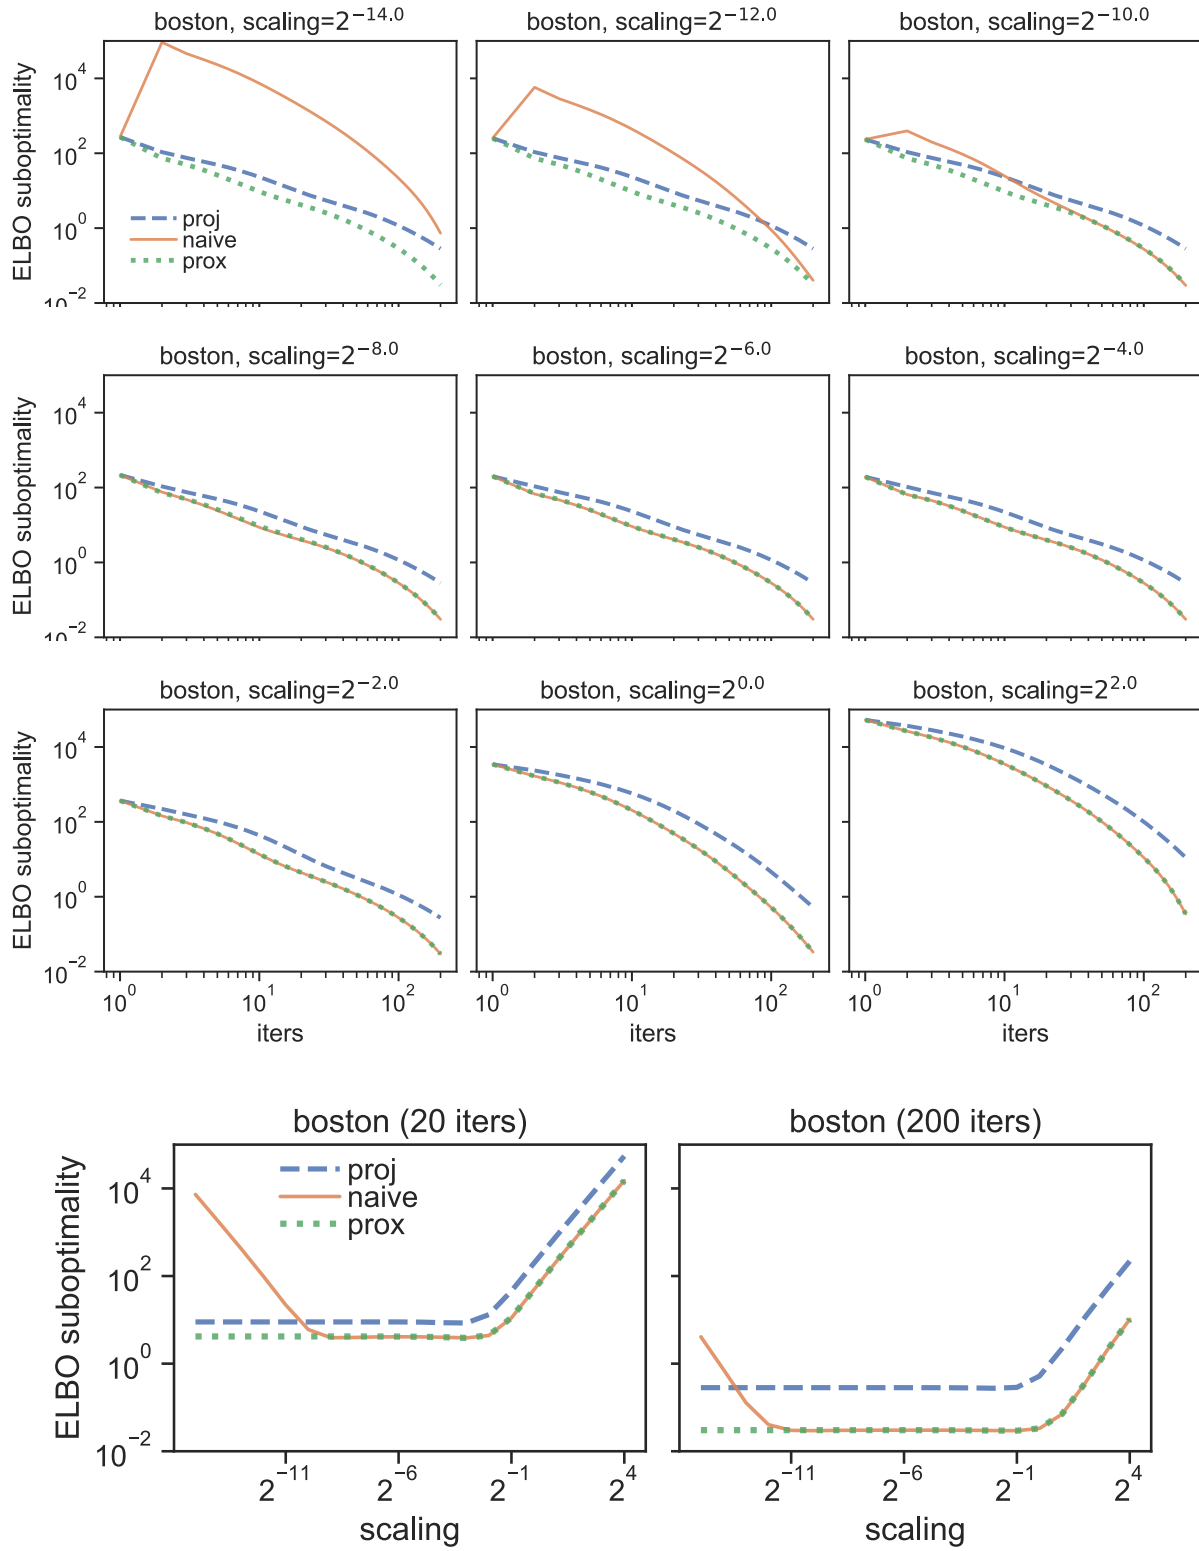

Figure 6. Looseness of the objective obtained by naive gradient descent ( $\gamma = 1/M$ ), projected gradient descent ( $\gamma = 1/(2M)$ ) and proximal gradient descent ( $\gamma = 1/M$ ). Optimization starts with  $\mathbf{m} = 0$  and  $C = \rho I$  where  $\rho$  is a scaling factor.

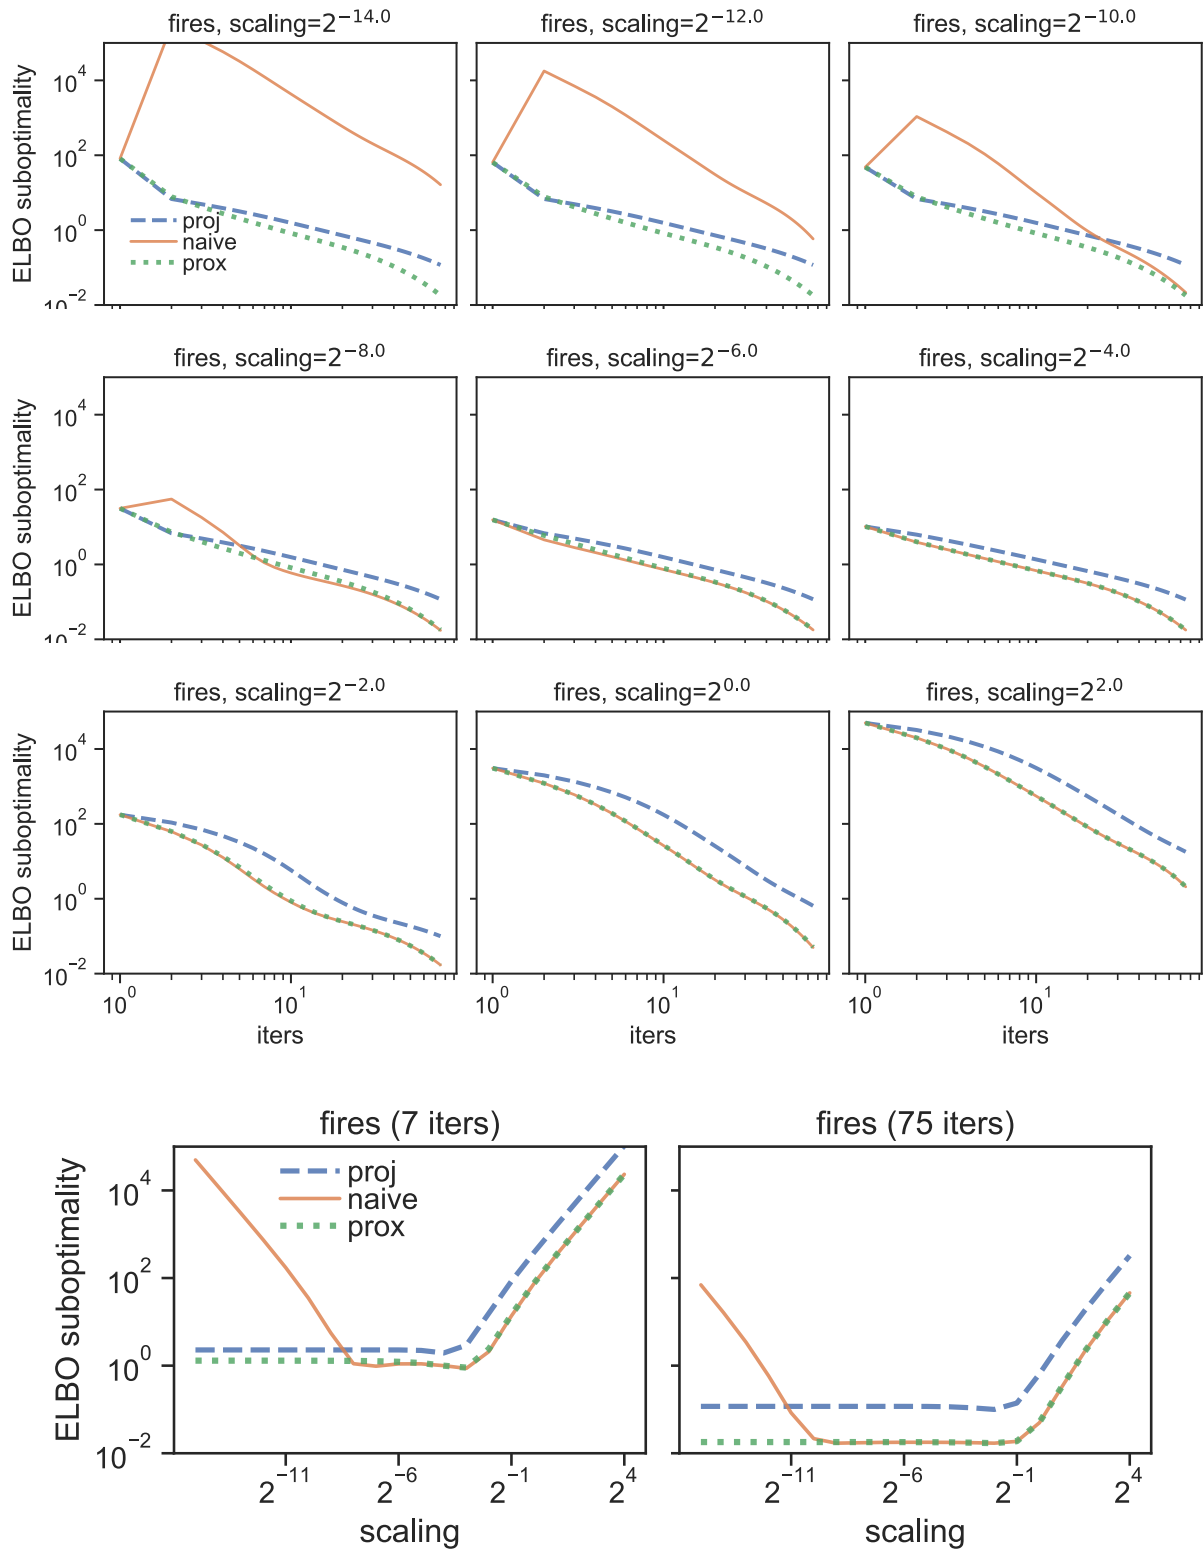

Figure 7. Looseness of the objective obtained by naive gradient descent ( $\gamma = 1/M$ ), projected gradient descent ( $\gamma = 1/(2M)$ ) and proximal gradient descent ( $\gamma = 1/M$ ). Optimization starts with  $\mathbf{m} = 0$  and  $C = \rho I$  where  $\rho$  is a scaling factor.

## 9. Proofs for Technical Lemmas

This section gives proofs for the technical lemmas used in the main result. Firstly, we show that  $\langle \cdot, \cdot \rangle_s$  is a valid inner-product.

**Lemma 2.**  $\langle \mathbf{a}, \mathbf{b} \rangle_s = \mathbb{E}_{\mathbf{u} \sim_s} \mathbf{a}(\mathbf{u})^\top \mathbf{b}(\mathbf{u})$  is a valid inner-product on squared-integrable  $\mathbf{a} : \mathbb{R}^d \rightarrow \mathbb{R}^k$ .

*Proof.* The space of square integrable functions is  $\{\mathbf{a} : \mathbb{R}^d \rightarrow \mathbb{R}^k \mid \mathbb{E}_{\mathbf{u} \sim_s} a_i(\mathbf{u})^2 \leq \infty \forall i \in \{1, \dots, k\}\}$ .

Since each component  $a_i(\mathbf{u})$  and  $b_i(\mathbf{u})$  is square-integrable with respect to  $s(\mathbf{u})$  we know (by Cauchy-Schwarz) that  $\mathbb{E}_{\mathbf{u} \sim_s} a_i(\mathbf{u})b_i(\mathbf{u}) \leq \sqrt{\mathbb{E}_{\mathbf{u} \sim_s} a_i(\mathbf{u})^2} \sqrt{\mathbb{E}_{\mathbf{u} \sim_s} b_i(\mathbf{u})^2}$  is finite and real. Therefore, we have by linearity of expectation that

$$\begin{aligned} \sum_{i=1}^k \mathbb{E}_{\mathbf{u} \sim_s} a_i(\mathbf{u})b_i(\mathbf{u}) &= \mathbb{E}_{\mathbf{u} \sim_s} \sum_{i=1}^k a_i(\mathbf{u})b_i(\mathbf{u}) \\ &= \mathbb{E}_{\mathbf{u} \sim_s} \mathbf{a}(\mathbf{u})^\top \mathbf{b}(\mathbf{u}) \\ &= \langle \mathbf{a}, \mathbf{b} \rangle_s \end{aligned}$$

is finite and real for all  $\mathbf{a}, \mathbf{b} \in V_s$ . To show that  $(V_s, \langle \cdot, \cdot \rangle_s)$  is a valid inner-product space, it is easy to establish all the necessary properties of the inner-product, namely for all  $\mathbf{a}, \mathbf{b}, \mathbf{c} \in V_s$ ,

$$\langle \mathbf{a}, \mathbf{b} \rangle = \langle \mathbf{b}, \mathbf{a} \rangle$$

$$\langle \theta \mathbf{a}, \mathbf{b} \rangle = \theta \langle \mathbf{a}, \mathbf{b} \rangle \text{ for } \theta \in \mathbb{R}$$

$$\langle \mathbf{a} + \mathbf{b}, \mathbf{c} \rangle = \langle \mathbf{a}, \mathbf{c} \rangle + \langle \mathbf{b}, \mathbf{c} \rangle$$

$$\langle \mathbf{a}, \mathbf{a} \rangle \geq 0$$

$\langle \mathbf{a}, \mathbf{a} \rangle = 0 \Leftrightarrow \mathbf{a} = \mathbf{0}$ . (Where  $\mathbf{0}(\varepsilon)$  is a function that always returns a vector of  $k$  zeros.)  $\square$

Next, we give three technical Lemmas, which do most of the work of the proof.

**Lemma 3.** Let  $\mathbf{a}_i(\mathbf{u}) = \frac{d}{dw_i} \mathbf{t}_w(\mathbf{u})$ . This is independent of  $w$  and  $\frac{dl(\mathbf{w})}{dw_i} = \langle \mathbf{a}_i, \nabla f \circ \mathbf{t}_w \rangle_s$ .

*Proof.* Now, we can write  $l(\mathbf{w})$  as

$$l(\mathbf{w}) = \mathbb{E}_{\mathbf{z} \sim_{q_w}} f(\mathbf{z}) = \mathbb{E}_{\mathbf{u} \sim_s} f(\mathbf{t}_w(\mathbf{u})).$$

Since  $\mathbf{t}_w(\mathbf{u}) = C\mathbf{u} + \mathbf{m}$  is an affine function, it's easy to see that both  $\frac{d}{dC_{ij}} \mathbf{t}_w(\mathbf{u})$  and  $\frac{d}{dm_i} \mathbf{t}_w(\mathbf{u})$  are independent of  $w$ . Therefore, the gradient of  $l(\mathbf{w})$  can be written as

$$\begin{aligned} \nabla_{w_i} l(\mathbf{w}) &= \nabla_{w_i} \mathbb{E}_{\mathbf{u} \sim_s} f(\mathbf{t}_w(\mathbf{u})) \\ &= \mathbb{E}_{\mathbf{u} \sim_s} \nabla_{w_i} \mathbf{t}_w(\mathbf{u})^\top \nabla f(\mathbf{t}_w(\mathbf{u})). \\ &= \langle \mathbf{a}_i, \nabla f \circ \mathbf{t}_w \rangle_s. \end{aligned}$$

$\square$

**Lemma 4.** If  $s$  is standardized, then the functions  $\{\mathbf{a}_i\}$  are orthonormal in  $\langle \cdot, \cdot \rangle_s$ .

*Proof.* It is easy to calculate that

$$\begin{aligned} \frac{d}{dm_i} \mathbf{t}_w(\mathbf{u}) &= \mathbf{e}_i \\ \frac{d}{dC_{ij}} \mathbf{t}_w(\mathbf{u}) &= \mathbf{e}_i u_j, \end{aligned}$$

where  $\mathbf{e}_i$  is the indicator vector in the  $i$ -th component. Therefore, we have that

$$\begin{aligned} \mathbb{E}_{\mathbf{u} \sim_s} \left( \frac{d}{dm_i} \mathbf{t}_w(\mathbf{u}) \right)^\top \left( \frac{d}{dm_j} \mathbf{t}_w(\mathbf{u}) \right) &= \mathbb{E}_{\mathbf{u} \sim_s} \mathbf{e}_i^\top \mathbf{e}_j \\ &= I[i = j] \\ \mathbb{E}_{\mathbf{u} \sim_s} \left( \frac{d}{dC_{ij}} \mathbf{t}_w(\mathbf{u}) \right)^\top \left( \frac{d}{dC_{kl}} \mathbf{t}_w(\mathbf{u}) \right) &= \mathbb{E}_{\mathbf{u} \sim_s} u_j \mathbf{e}_i^\top \mathbf{e}_k \\ &= I[i = k] \mathbb{E}_{\mathbf{u} \sim_s} u_j \\ &= 0 \\ &\text{(since zero mean)} \\ \mathbb{E}_{\mathbf{u} \sim_s} \left( \frac{d}{dC_{ij}} \mathbf{t}_w(\mathbf{u}) \right)^\top \left( \frac{d}{dC_{kl}} \mathbf{t}_w(\mathbf{u}) \right) &= \mathbb{E}_{\mathbf{u} \sim_s} u_j u_l \mathbf{e}_i^\top \mathbf{e}_k \\ &= I[i = k] \mathbb{E}_{\mathbf{u} \sim_s} u_j u_l \\ &= I[i = k] I[j = l] \\ &\text{(since unit variance and zero mean)} \end{aligned}$$

These three identities are equivalent to stating that  $\{\mathbf{a}_i\}$  are orthonormal in  $\langle \cdot, \cdot \rangle_s$ .  $\square$

**Lemma 5.** If  $s$  is standardized, then  $\mathbb{E}_{\mathbf{u} \sim_s} \|\mathbf{t}_w(\mathbf{u}) - \mathbf{t}_v(\mathbf{u})\|_2^2 = \|\mathbf{w} - \mathbf{v}\|_2^2$ .

*Proof.* Let  $\Delta \mathbf{m}$  and  $\Delta S$  denote the difference of the  $\mathbf{m}$  and  $S$  parts of  $\mathbf{w}$ , respectively. We want to calculate

$$\begin{aligned} \mathbb{E}_{\mathbf{u} \sim_s} \|\mathbf{t}_w(\mathbf{u}) - \mathbf{t}_v(\mathbf{u})\|_2^2 &= \mathbb{E}_{\mathbf{u} \sim_s} \|\Delta C \varepsilon + \Delta \mathbf{m}\|_2^2 \\ &= \mathbb{E}_{\mathbf{u} \sim_s} \left( \|\Delta C \mathbf{u}\|_2^2 + 2\Delta \mathbf{m}^\top \Delta C \mathbf{u} + \|\Delta \mathbf{m}\|_2^2 \right). \end{aligned}$$

It is easy to see that the expectation of the middle term is zero, and the last is a constant. The expectation of the first

term is

$$\begin{aligned}
 \mathbb{E}_{\mathbf{u} \sim s} \|(\Delta C)\mathbf{u}\|_2^2 &= \mathbb{E}_{\mathbf{u} \sim s} \mathbf{u}^\top (\Delta C)^\top (\Delta C) \mathbf{u} \\
 &= \mathbb{E}_{\mathbf{u} \sim s} \text{tr}(\mathbf{u}^\top (\Delta C)^\top (\Delta C) \mathbf{u}) \\
 &= \mathbb{E}_{\mathbf{u} \sim s} \text{tr}((\Delta C)^\top (\Delta C) \mathbf{u} \mathbf{u}^\top) \\
 &= \text{tr}((\Delta C)^\top (\Delta C)) = \|\nabla C\|_F^2. \\
 &\quad (\text{since zero mean and unit variance})
 \end{aligned}$$

Putting this together gives that

$$\begin{aligned}
 \mathbb{E}_{\mathbf{u} \sim s} \|\mathbf{t}_{\mathbf{w}}(\mathbf{u}) - \mathbf{t}_{\mathbf{v}}(\mathbf{u})\|_2^2 &= \|\Delta C\|_F^2 + \|\Delta \mathbf{m}\|_2^2 \\
 &= \|\mathbf{w} - \mathbf{v}\|_2^2.
 \end{aligned}$$

□

## 10. Proof for Example Function

**Theorem 6.** Let  $q_w = \text{LocScale}(\mathbf{m}, C, s)$  with parameters  $w = (\mathbf{m}, C)$  and a standardized base distribution  $s$  and let  $f(\mathbf{z}) = \frac{a}{2} \|\mathbf{z} - \mathbf{z}^*\|_2^2$ . Then  $l(w) = \mathbb{E}_{\mathbf{z} \sim q_w} f(\mathbf{z}) = \frac{a}{2} (\|\mathbf{m} - \mathbf{z}^*\|_2^2 + \|C\|_F^2)$ .

*Proof.* For a general distribution, we have that

$$\begin{aligned} \mathbb{E} f(\mathbf{z}) &= \frac{a}{2} \mathbb{E} \|\mathbf{z} - \mathbb{E}[\mathbf{z}] + \mathbb{E}[\mathbf{z}] - \mathbf{z}^*\|_2^2 \\ &= \frac{a}{2} \mathbb{E} \left( \|\mathbf{z} - \mathbb{E}[\mathbf{z}]\|_2^2 \right. \\ &\quad \left. + 2(\mathbf{z} - \mathbb{E}[\mathbf{z}])^\top (\mathbb{E}[\mathbf{z}] - \mathbf{z}^*) + \|\mathbb{E}[\mathbf{z}] - \mathbf{z}^*\|_2^2 \right) \\ &= \frac{a}{2} \left( \text{tr } \mathbb{V}[\mathbf{z}] + \|\mathbb{E}[\mathbf{z}] - \mathbf{z}^*\|_2^2 \right). \end{aligned}$$

Now, if  $q_w$  is a location-scale family, we have that  $\mathbf{z} = C\mathbf{u} + \mathbf{m}$ . Thus,

$$\begin{aligned} \text{tr } \mathbb{V}[\mathbf{z}] &= \text{tr } \mathbb{V}[C\mathbf{u} + \mathbf{m}] \\ &= \text{tr } \mathbb{V}[C\mathbf{u}] \\ &= \text{tr } C \mathbb{V}[\mathbf{u}] C^\top \\ &= \text{tr } C C^\top \mathbb{V}[\mathbf{u}]. \end{aligned}$$

Meanwhile, we have that

$$\begin{aligned} \|\mathbb{E}[\mathbf{z}] - \mathbf{z}^*\|_2^2 &= \|\mathbb{E}[C\mathbf{u} + \mathbf{m}] - \mathbf{z}^*\|_2^2 \\ &= \|C \mathbb{E}[\mathbf{u}] + \mathbf{m} - \mathbf{z}^*\|_2^2 \end{aligned}$$

Thus,

$$\mathbb{E} f(\mathbf{z}) = \frac{a}{2} \left( \text{tr } C \mathbb{V}[\mathbf{u}] C^\top + \|C \mathbb{E}[\mathbf{u}] + \mathbf{m} - \mathbf{z}^*\|_2^2 \right).$$

The case where  $s$  is standardized follows from substituting  $\mathbb{E}[\mathbf{u}] = 0$  and  $\mathbb{V}[\mathbf{u}] = I$  and applying the fact that  $\text{tr } C C^\top = \|C\|_F^2$ .  $\square$



## 11. Proofs for Solution Guarantees

**Lemma 8.** Let  $q_{\mathbf{w}} = \text{LocScale}(\mathbf{m}, C, s)$  with parameters  $\mathbf{w} = (\mathbf{m}, C)$  and a standardized and spherically symmetric base distribution  $s$ . Let  $l(\mathbf{w}) = \mathbb{E}_{\mathbf{z} \sim q_{\mathbf{w}}} f(\mathbf{z})$ . Suppose  $C$  is diagonal and  $f$  is  $M$ -smooth. Then,  $|\frac{dl(\mathbf{w})}{dC_{ii}}| \leq M|C_{ii}|$ .

*Proof.* Define  $\mathbf{w}'$  to be  $\mathbf{w}$  but with  $C_{ii}$  set to zero. We will first show that  $\frac{dl(\mathbf{w}')}{dC_{ii}} = 0$ . Using the definition of  $\mathbf{t}_{\mathbf{w}}$  and the fact that  $\frac{d}{dC_{ij}} \mathbf{t}_{\mathbf{w}}(u) = \mathbf{e}_i u_j$  gives that

$$\frac{d}{dC_{ii}} l(\mathbf{w}') = \mathbb{E}_{\mathbf{u} \sim s} \frac{d}{dC_{ii}} f(\mathbf{t}_{\mathbf{w}'}(\mathbf{u})) \quad (11)$$

$$= \mathbb{E}_{\mathbf{u} \sim s} \mathbf{u}_i \mathbf{e}_i^\top \nabla f(\mathbf{t}_{\mathbf{w}'}(\mathbf{u})) \quad (12)$$

$$= 0. \quad (13)$$

The final equality above follows from the facts that  $\mathbb{E} \mathbf{u}_i = 0$  and  $\mathbf{u}_i \perp \mathbf{e}_i^\top \nabla f(\mathbf{t}_{\mathbf{w}'}(\mathbf{u}))$  (Since  $\mathbf{t}_{\mathbf{w}'}(\mathbf{u})$  ignores  $\mathbf{u}_i$ ) so the expectation in Eq. (11) is over two independent random variables, one with mean zero. Now, by Thm. 1,  $l$  is also  $M$ -smooth, thus

$$\begin{aligned} \left| \frac{dl(\mathbf{w})}{dC_{ii}} \right| &= \left| \frac{dl(\mathbf{w}')}{dC_{ii}} - \frac{dl(\mathbf{w})}{dC_{ii}} \right| \\ &\leq \|\nabla l(\mathbf{w}') - \nabla l(\mathbf{w})\|_2 \\ &\leq M \|\mathbf{w}' - \mathbf{w}\|_2 \\ &= M |C_{ii}|. \end{aligned}$$

□

**Theorem 7.** Let  $q_{\mathbf{w}} = \text{LocScale}(\mathbf{m}, C, s)$  with parameters  $\mathbf{w} = (\mathbf{m}, C)$  and a standardized and spherically symmetric base distribution  $s$ . Suppose  $\mathbf{w}$  minimizes  $l(\mathbf{w}) + h(\mathbf{w})$  from Eq. (1) and  $\log p(\mathbf{z}, \mathbf{x})$  is  $M$ -smooth over  $\mathbf{z}$ . Then,  $\mathbf{w} \in \mathcal{W}_M$ .

*Proof.* First, suppose that  $C$  is diagonal. Since  $\mathbf{w}$  minimizes  $l + h$ ,  $\nabla l(\mathbf{w}) = -\nabla h(\mathbf{w})$ . The gradient of  $h$  with respect to  $C$  is  $-C^{-\top}$ . Thus,  $|\frac{dl(\mathbf{w})}{dC_{ii}}| = |\frac{dh(\mathbf{w})}{dC_{ii}}| = \frac{1}{|C_{ii}|}$ . But by Lem. 8,  $|\frac{dl(\mathbf{w})}{dC_{ii}}| \leq M|C_{ii}|$ . This establishes the claim for diagonal  $C$ .

Now, consider some non-diagonal  $C$ . Let the singular value decomposition be  $C = USV^\top$ . Define  $f_U(\mathbf{z}) = f(U\mathbf{z})$  and define  $l_U$  with respect to  $f_U$ . Let  $\mathbf{w}' = (S, U^\top \mathbf{m})$ . Then, the following statements are equivalent to  $\mathbf{w} \in \text{argmin}_{\mathbf{w}} l(\mathbf{w}) + h(\mathbf{w})$ :

$$\begin{aligned} (C, \mathbf{m}) &\in \text{argmin}_{(C, \mathbf{m})} \mathbb{E}_{\mathbf{u} \sim s} f(C\mathbf{u} + \mathbf{m}) - \log |C| \\ &\Leftrightarrow (S, \mathbf{m}) \in \text{argmin}_{(S, \mathbf{m})} \mathbb{E}_{\mathbf{u} \sim s} f(USV^\top \mathbf{u} + \mathbf{m}) - \log |USV^\top| \\ &\Leftrightarrow (S, \mathbf{m}) \in \text{argmin}_{(S, \mathbf{m})} \mathbb{E}_{\mathbf{u} \sim s} f(US\mathbf{u} + \mathbf{m}) - \log |S| \\ &\Leftrightarrow (S, \mathbf{m}) \in \text{argmin}_{(S, \mathbf{m})} \mathbb{E}_{\mathbf{u} \sim s} f_U(S\mathbf{u} + U^\top \mathbf{m}) - \log |S| \\ &\Leftrightarrow \mathbf{w}' \in \text{argmin}_{\mathbf{w}'} l_U(\mathbf{w}') + h(\mathbf{w}'). \end{aligned}$$

Thus,  $\mathbf{w}$  minimizing  $l + h$  is equivalent to  $\mathbf{w}'$  minimizing  $l_U + h$ . Since  $f_U$  is  $M$ -smooth and  $S$  is diagonal, we know that  $S_{ii} \geq \frac{1}{\sqrt{M}}$  for all. □

## 12. Proofs with Convexity

**Theorem 10.** *Let  $q_{\mathbf{w}} = \text{LocScale}(\mathbf{m}, C, s)$  with parameters  $\mathbf{w} = (\mathbf{m}, C)$  and a standardized and spherically symmetric base distribution  $s$ . Suppose  $\mathbf{w}$  minimizes  $l(\mathbf{w}) + h(\mathbf{w})$  from Eq. (1) and  $-\log p(\mathbf{z}, \mathbf{x})$  is  $c$ -strongly convex over  $\mathbf{z}$ . Then,  $\|C\|_F^2 + \|\mathbf{m} - \mathbf{z}^*\|_2^2 \leq \frac{d}{c}$ , where  $\mathbf{z}^* = \text{argmax}_{\mathbf{z}} \log(\mathbf{z}, \mathbf{x})$ .*

It's easy to see that  $l$  is minimized by  $\bar{\mathbf{w}} = (\mathbf{z}^*, \mathbf{0}_{d \times d})$ . By Thm. 9,  $l(\mathbf{w})$  is  $c$ -strongly convex. Thus applying a standard inner-product result on strong convexity (Nesterov, 2014, Thm. 2.1.9),

$$\begin{aligned}
 c \|\mathbf{w} - \bar{\mathbf{w}}\|_2^2 &\leq \langle \nabla l(\mathbf{w}) - \nabla l(\bar{\mathbf{w}}), \mathbf{w} - \bar{\mathbf{w}} \rangle \\
 &\quad (\text{since } l \text{ is strongly convex}) \\
 &= \langle \nabla l(\mathbf{w}), \mathbf{w} - \bar{\mathbf{w}} \rangle \\
 &\quad (\text{since } \nabla l(\bar{\mathbf{w}}) = 0) \\
 &= -\langle \nabla h(\mathbf{w}), \mathbf{w} - \bar{\mathbf{w}} \rangle \\
 &\quad (\text{since } \nabla l(\mathbf{w}) + \nabla h(\mathbf{w}) = 0) \\
 &= \text{tr}(C^{-\top} C) \\
 &\quad (\text{since } \nabla_C h(\mathbf{w}) = -C^{-\top}, \nabla_{\mathbf{m}} h(\mathbf{w}) = 0). \\
 &= \text{tr } I = d.
 \end{aligned}$$

The result follows from observing that  $\|\mathbf{w} - \bar{\mathbf{w}}\|_2^2 = \|C\|_F^2 + \|\mathbf{m} - \mathbf{z}^*\|_2^2$ .

### 13. Convergence Considerations

**Lemma 12.** Let  $q_w = \text{LocScale}(\mathbf{m}, C, s)$  with parameters  $\mathbf{w} = (\mathbf{m}, C)$ . Then,  $h(\mathbf{w}) = \mathbb{E}_{\mathbf{z} \sim q_w} [\log q_w(\mathbf{z})]$  is  $M$ -smooth over  $\mathcal{W}_M$ .

*Proof.* Take  $\mathbf{w} = (C, \mathbf{m}) \in \mathcal{W}_M$  and  $\mathbf{v} = (B, \mathbf{n}) \in \mathcal{W}_M$ . We write  $h(C)$  since  $h(\mathbf{w})$  is independent of  $\mathbf{m}$ . The gradient is  $\nabla h(C) = C^{-T}$ . Now, use that  $\|AX\|_F \leq \|A\|_2 \|X\|_F$  to get that

$$\begin{aligned} \|\nabla h(B) - \nabla h(C)\|_F &= \|B^{-1} - C^{-1}\|_F \\ &= \|B^{-1}(B - C)C^{-1}\|_F \\ &\leq \|B^{-1}\|_2 \|C^{-1}\|_2 \|B - C\|_F. \end{aligned}$$

But, since  $\mathbf{w} \in \mathcal{W}_M$ ,  $\|C^{-1}\|_2 = \frac{1}{\sigma_{\min}(C)} \leq \sqrt{M}$  and similarly for  $B$ . This establishes that  $\|\nabla h(B) - \nabla h(C)\|_F \leq M \|B - C\|_F$ , equivalent to the result.  $\square$

**Theorem 13.** Suppose  $h(\mathbf{w})$  corresponds to a location-scale family with a standardized  $s$ , and  $\mathbf{w} = (\mathbf{m}, C)$ .

- If  $C$  has singular value decomposition  $C = USV^\top$ , then  $\text{proj}_{\mathcal{W}_M}(\mathbf{w}) = (\mathbf{m}, UTV^\top)$ , where  $T$  is a diagonal matrix with  $T_{ii} = \max\left(S_{ii}, \frac{1}{\sqrt{M}}\right)$ .
- If  $C$  is triangular with a positive diagonal, then  $\text{prox}_\gamma(\mathbf{w}) = (\mathbf{m}, C + \Delta C)$ , where  $\Delta C$  is a diagonal matrix with  $\Delta C_{ii} = \frac{1}{2} \left( \sqrt{C_{ii}^2 + 4\gamma} - C_{ii} \right)$ .

*Proof. (Proximal Operator)* We know that  $h(\mathbf{w}) = \text{Const.} - \log |C|$ . Write  $\mathbf{w} = (\mathbf{m}, C)$  and  $\mathbf{v} = (\mathbf{n}, B)$ . Then, we can write the proximal operator as

$$\text{prox}_\lambda(\mathbf{w}) = \underset{\mathbf{v}}{\text{argmin}} -\log |B| + \frac{1}{2\lambda} \|\mathbf{v} - \mathbf{w}\|_2^2$$

Now, assuming that  $C$  is triangular, the solution will leave all entries of  $\mathbf{w}$  other than the diagonal entries of  $C$  unchanged. Then, we will have that  $\log |B| = \sum_{i=1}^d \log B_{ii}$ . Since

$$\underset{x>0}{\text{argmin}} -\log x + \frac{1}{2\lambda} (x - y)^2 = \frac{y + \sqrt{y^2 + 4\lambda}}{2}$$

The solution is to set

$$\begin{aligned} B_{ii} &= \frac{1}{2} \left( C_{ii} + \sqrt{C_{ii}^2 + 4\lambda} \right) \\ &= C_{ii} + \frac{1}{2} \left( \sqrt{C_{ii}^2 + 4\lambda} - C_{ii} \right). \end{aligned}$$

**(Projection Operator)** Von-Neumann's trace inequality states that  $|\text{tr} A^\top B| \leq \sum_i \sigma_i(A) \sigma_i(B)$ . Consider any candidate solution  $B$  with SVD  $QTP^\top$ . Then, we can write that

$$\begin{aligned} \|B - C\|_F^2 &= \text{tr} (B - C)^\top (B - C) \\ &= \|B\|_F^2 - 2 \text{tr}(B^\top C) + \|C\|_F^2 \\ &\geq \|T\|_F^2 - 2 \sum_i T_{ii} S_{ii} + \sum_i S_{ii}^2 \\ &= \sum_i (T_{ii} - S_{ii})^2. \end{aligned}$$

We can minimize this lower bound by choosing  $T_{ii} = \max(1/\sqrt{M}, S_{ii})$ , with a corresponding value of  $\sum_i \max(0, 1/\sqrt{M} - S_{ii})^2$ . Thus any valid solution will have  $\|B - C\|_F^2$  at least this large.

However, suppose we choose  $B = UT_i V^\top$  with  $T_{ii}$  as above. Then,

$$\|B - C\|_F^2 = \|UTV^\top - USV^\top\|_F^2 = \sum_i (T_{ii} - S_{ii})^2,$$

so this value  $B$  is optimal.  $\square$
